# Supplementary material
Source: HighWire-hosted journal article supplement (https://erj.ersjournals.com/content/52/3/1800589)

## SUPPLEMENTAL TABLES:

**Table S1:** Baseline characteristics in CTEPH-technically-operable-not-operated sub-groups (declined surgery (patient choice), unfit for surgery and CTEPH where symptoms may be related to other factors in addition to clot burden)

|                                                                       | Declined surgery - patient choice | Unfit for surgery       | Other contributors to symptoms in addition to clot burden |
|-----------------------------------------------------------------------|-----------------------------------|-------------------------|-----------------------------------------------------------|
| Number                                                                | 72                                | 63                      | 31                                                        |
| Age (years)                                                           | 68 (16)                           | 70 (12)                 | 69 (12)                                                   |
| Gender (% , Female)                                                   | 63                                | 41                      | 45                                                        |
| BMI                                                                   | 29 (7)                            | 29 (8)                  | 32 (8)                                                    |
| WHO FC (I/II vs III/IV)                                               | 17/83                             | 3/97 <sup>#</sup>       | 19/81                                                     |
| Duration of symptoms (<1 year/1-2 years/2-5 years/>5 years/not clear) | 22/38/17/11/13                    | 11/37/18/21/14          | 19/36/23/10/7                                             |
| ISWD (m)                                                              | 169 (177) <sup>*</sup>            | 95 (119) <sup>#,+</sup> | 210 (162) <sup>*</sup>                                    |
| RAP (mmHg)                                                            | 12 (6) <sup>+</sup>               | 11 (6)                  | 8 (3) <sup>#</sup>                                        |
| mPAP(mmHg)                                                            | 46 (10) <sup>+</sup>              | 46 (10) <sup>+</sup>    | 31 (7) <sup>#,*</sup>                                     |
| CI (L/min/m2)                                                         | 2.6 (0.8) <sup>+</sup>            | 2.4 (0.7) <sup>+</sup>  | 3.3 (0.6) <sup>#,*</sup>                                  |
| PCWP (mmHg)                                                           | 12 (5)                            | 13 (6)                  | 13 (6)                                                    |
| PVR (Wood Units)                                                      | 8 (4) <sup>+</sup>                | 8.5 (5) <sup>+</sup>    | 3 (1.4) <sup>#</sup>                                      |
| SvO <sub>2</sub> (%)                                                  | 61 (9) <sup>+</sup>               | 59 (9) <sup>+</sup>     | 68 (6) <sup>#,*</sup>                                     |
| FEV <sub>1</sub> (% predicted)                                        | 82 (21) <sup>*</sup>              | 66 (22) <sup>#,+</sup>  | 81 (23) <sup>*</sup>                                      |
| DL <sub>CO</sub> (% predicted)                                        | 61 (17) <sup>*</sup>              | 43 (16) <sup>#,+</sup>  | 65 (18) <sup>*</sup>                                      |
| History of VTE (%)                                                    | 70                                | 76                      | 90                                                        |
| IVC filter (%)                                                        | 4                                 | 8                       | 0                                                         |
| Thrombophilia (%)                                                     | 7                                 | 2                       | 0                                                         |
| History of cancer (%)                                                 | 6 <sup>+</sup>                    | 19                      | 32 <sup>#</sup>                                           |
| Smoking (%)                                                           | 35 <sup>*</sup>                   | 62 <sup>#,+</sup>       | 36 <sup>*</sup>                                           |
| Obesity (%)                                                           | 26                                | 30                      | 45                                                        |
| CAD (%)                                                               | 8                                 | 21                      | 13                                                        |
| LV dysfunction (%)                                                    | 6                                 | 13                      | 10                                                        |
| Valvular heart disease (%)                                            | 0                                 | 3                       | 3                                                         |
| CKD (%)                                                               | 14                                | 13                      | 10                                                        |
| COPD (%)                                                              | 17 <sup>*</sup>                   | 48 <sup>#</sup>         | 29                                                        |
| PH therapy following diagnosis (%)                                    | 75 <sup>*,+</sup>                 | 87 <sup>#,+</sup>       | 13 <sup>#,*</sup>                                         |

Definition of abbreviations: n = number of patients; BMI = body mass index; WHO FC = World Health Organization functional class; ISWD = incremental shuttle walk distance; RAP = right atrial pressure; mPAP = mean pulmonary arterial pressure; CI = cardiac index; PCWP = pulmonary capillary wedge pressure; PVR = pulmonary vascular resistance; SvO<sub>2</sub> = mixed venous oxygen saturation; FEV<sub>1</sub> = forced expiratory volume in one second; DL<sub>CO</sub> = diffusing capacity of lung for carbon monoxide; VTE = venous thromboembolism; IVC = inferior vena cava; PE = pulmonary embolism; CAD = coronary artery disease; LV = left ventricle; CKD = chronic kidney disease; COPD = chronic obstructive pulmonary disease; PH = pulmonary hypertension; Values are mean (standard deviation) or percentage unless otherwise indicated.

Mean (standard deviation) or percentage presented.

#: p < 0.05 in comparison to CTEPH- technically-operable-not operated (patient choice).

\*: p < 0.05 in comparison to CTEPH-technically-operable-not-operated (unfit for surgery).

+: p < 0.05 in comparison to CTEPH, technically-operable-not operated (other contributors to symptoms in addition to clot burden).

**Table S2:** Cox regression survival analysis of CTEPH-technically-operable-not-operated group

|                    |                                | Univariate analysis |           |          | Multivariate analysis |           |          |
|--------------------|--------------------------------|---------------------|-----------|----------|-----------------------|-----------|----------|
| Covariates         |                                | HR                  | 95% CI    | p- value | HR                    | 95% CI    | p- value |
| Age*               | /14 years                      | 1.33                | 1.02-1.74 | 0.034    |                       |           |          |
| WHO FC             | I/II or III/IV<br>(ref = I/II) | 2.80                | 0.88-8.95 | 0.081    |                       |           |          |
| ISWD*              | /160 m                         | 0.59                | 0.39-0.79 | 0.001    |                       |           |          |
| RAP*               | /5 mmHg                        | 1.38                | 1.10-1.73 | 0.005    |                       |           |          |
| CI*                | /0.8 L/min/m <sup>2</sup>      | 0.62                | 0.46-0.82 | 0.001    |                       |           |          |
| PVR*               | /4.6 Wood Units                | 1.59                | 1.27-2.00 | <0.001   |                       |           |          |
| SvO <sub>2</sub> * | /9%                            | 0.56                | 0.44-0.72 | <0.001   | 0.53                  | 0.38-0.76 | <0.001   |
| DL <sub>CO</sub> * | /19 %                          | 0.53                | 0.39-0.71 | <0.001   | 0.54                  | 0.38-0.75 | <0.001   |
| Cancer             | Ref=absent                     | 2.98                | 1.72-5.15 | <0.001   | 4.10                  | 2.02-8.37 | <0.001   |
| CAD                | Ref=absent                     | 2.18                | 1.21-3.95 | 0.010    |                       |           |          |
| CKD                | Ref=absent                     | 1.89                | 1.03-3.48 | 0.041    |                       |           |          |

Data shown for univariate analysis where p < 0.20, 71 variables were imported into univariate analysis.

Definition of abbreviations: Ref= reference parameter; WHO FC = World Health Organization functional class; ISWD = incremental shuttle walk distance; RAP = right atrial pressure; CI = cardiac index; PVR = pulmonary vascular resistance; SvO<sub>2</sub> = mixed venous oxygen saturation; DL<sub>CO</sub> = diffusing capacity of lung for carbon monoxide; CAD = coronary artery disease; CKD = chronic kidney disease;

\* These variables are scaled so that the hazard ratio (HR) is the change by one standard deviation (SD).

**Table S3:** Cox regression survival analysis for CTEPH-technically-operable-not-operated: patient choice, unfit for surgery and other contributors to symptoms in addition to clot burden sub-groups

| <b>Patient choice</b>                                            |                              | <b>Univariate analysis</b> |               |                | <b>Multivariate analysis</b> |               |                |
|------------------------------------------------------------------|------------------------------|----------------------------|---------------|----------------|------------------------------|---------------|----------------|
| <b>Covariates</b>                                                |                              | <b>HR</b>                  | <b>95% CI</b> | <b>p-value</b> | <b>HR</b>                    | <b>95% CI</b> | <b>p-value</b> |
| Age*                                                             | /16 years                    | 1.40                       | 0.88-2.25     | 0.160          |                              |               |                |
| WHO FC                                                           | I/II or III/IV<br>ref = I/II | 27.42                      | 0.27-2732.21  | 0.158          |                              |               |                |
| ISWD*                                                            | /177 m                       | 0.71                       | 0.42-1.19     | 0.187          |                              |               |                |
| RAP*                                                             | /6mmHg                       | 1.83                       | 1.23-2.73     | 0.003          |                              |               |                |
| CI*                                                              | /0.8 L/min/m <sup>2</sup>    | 0.70                       | 0.44-1.10     | 0.121          |                              |               |                |
| PVR*                                                             | /4.25 Wood Units             | 1.58                       | 1.01-2.49     | 0.047          |                              |               |                |
| SvO <sub>2</sub> *                                               | /9%                          | 0.53                       | 0.34-0.82     | 0.004          | 0.24                         | 0.12-0.51     | <0.001         |
| DL <sub>co</sub> *                                               | /17%                         | 0.52                       | 0.31-0.85     | 0.009          |                              |               |                |
| Thyroid disorder                                                 | ref = absent                 | 1.91                       | 0.74-4.91     | 0.182          |                              |               |                |
| CAD                                                              | ref = absent                 | 2.28                       | 0.67-7.77     | 0.189          |                              |               |                |
| <b>Unfit for surgery</b>                                         |                              | <b>Univariate analysis</b> |               |                | <b>Multivariate analysis</b> |               |                |
| <b>Covariates</b>                                                |                              | <b>HR</b>                  | <b>95% CI</b> | <b>p-value</b> | <b>HR</b>                    | <b>95% CI</b> | <b>p-value</b> |
| ISWD*                                                            | /114 m                       | 0.65                       | 0.42-0.99     | 0.046          | 0.41                         | 0.21-0.79     | 0.008          |
| RAP*                                                             | /6 mmHg                      | 1.27                       | 0.89-1.82     | 0.185          |                              |               |                |
| CI*                                                              | /0.7 L/min/m <sup>2</sup>    | 0.66                       | 0.44-1.01     | 0.054          |                              |               |                |
| PVR*                                                             | /4.94 Wood Units             | 1.34                       | 0.94-1.88     | 0.102          |                              |               |                |
| SvO <sub>2</sub> *                                               | /9%                          | 0.64                       | 0.44-0.92     | 0.016          |                              |               |                |
| DL <sub>co</sub> *                                               | /17 %                        | 0.75                       | 0.51-1.09     | 0.133          |                              |               |                |
| Cancer                                                           | ref = absent                 | 2.96                       | 1.47-5.97     | 0.002          | 8.77                         | 2.76-27.81    | <0.001         |
| CKD                                                              | ref = absent                 | 2.46                       | 1.06-5.68     | 0.035          | 6.98                         | 1.96-24.89    | 0.003          |
| <b>Other contributors to symptoms in addition to clot burden</b> |                              | <b>Univariate analysis</b> |               |                | <b>Multivariate analysis</b> |               |                |
| <b>Covariates</b>                                                |                              | <b>HR</b>                  | <b>95% CI</b> | <b>p-value</b> | <b>HR</b>                    | <b>95% CI</b> | <b>p-value</b> |
| Age*                                                             | /12 years                    | 2.53                       | 0.97-6.81     | 0.067          |                              |               |                |
| WHO FC                                                           | I/II or III/IV<br>ref = I/II | 4.76                       | 0.106-21.33   | 0.041          |                              |               |                |
| ISWD*                                                            | /162m                        | 0.55                       | 0.23-1.35     | 0.193          |                              |               |                |
| Cancer                                                           | ref = absent                 | 6.63                       | 1.98-49.85    | 0.005          | 9.93                         | 1.98-49.85    | 0.005          |
| LV dysfunction                                                   | ref = absent                 | 4.55                       | 0.89-23.08    | 0.067          |                              |               |                |

Data shown for univariate analysis where  $p < 0.20$ , 71 variables were imported into univariate analysis.

Definition of abbreviations: ref = reference parameter; WHO FC = World Health Organization functional class; ISWD = incremental shuttle walk distance; RAP = right atrial pressure; CI = cardiac index; PVR = pulmonary vascular resistance; SvO<sub>2</sub> = mixed venous oxygen saturation; DL<sub>CO</sub> = diffusing capacity of lung for carbon monoxide; CAD = coronary artery disease; CKD = chronic kidney disease; VTE = venous thromboembolism; LV = left ventricular;

\* These variables are scaled so that the hazard ratio (HR) is the change by one standard deviation (SD).

**Figure S1:** Kaplan-Meier estimates of survival from date of diagnosis comparing outcomes in patients with technically operable CTEPH who declined surgery (patient choice) were considered unfit for surgery or in whom comorbidities contributed to symptoms in addition to clot burden.

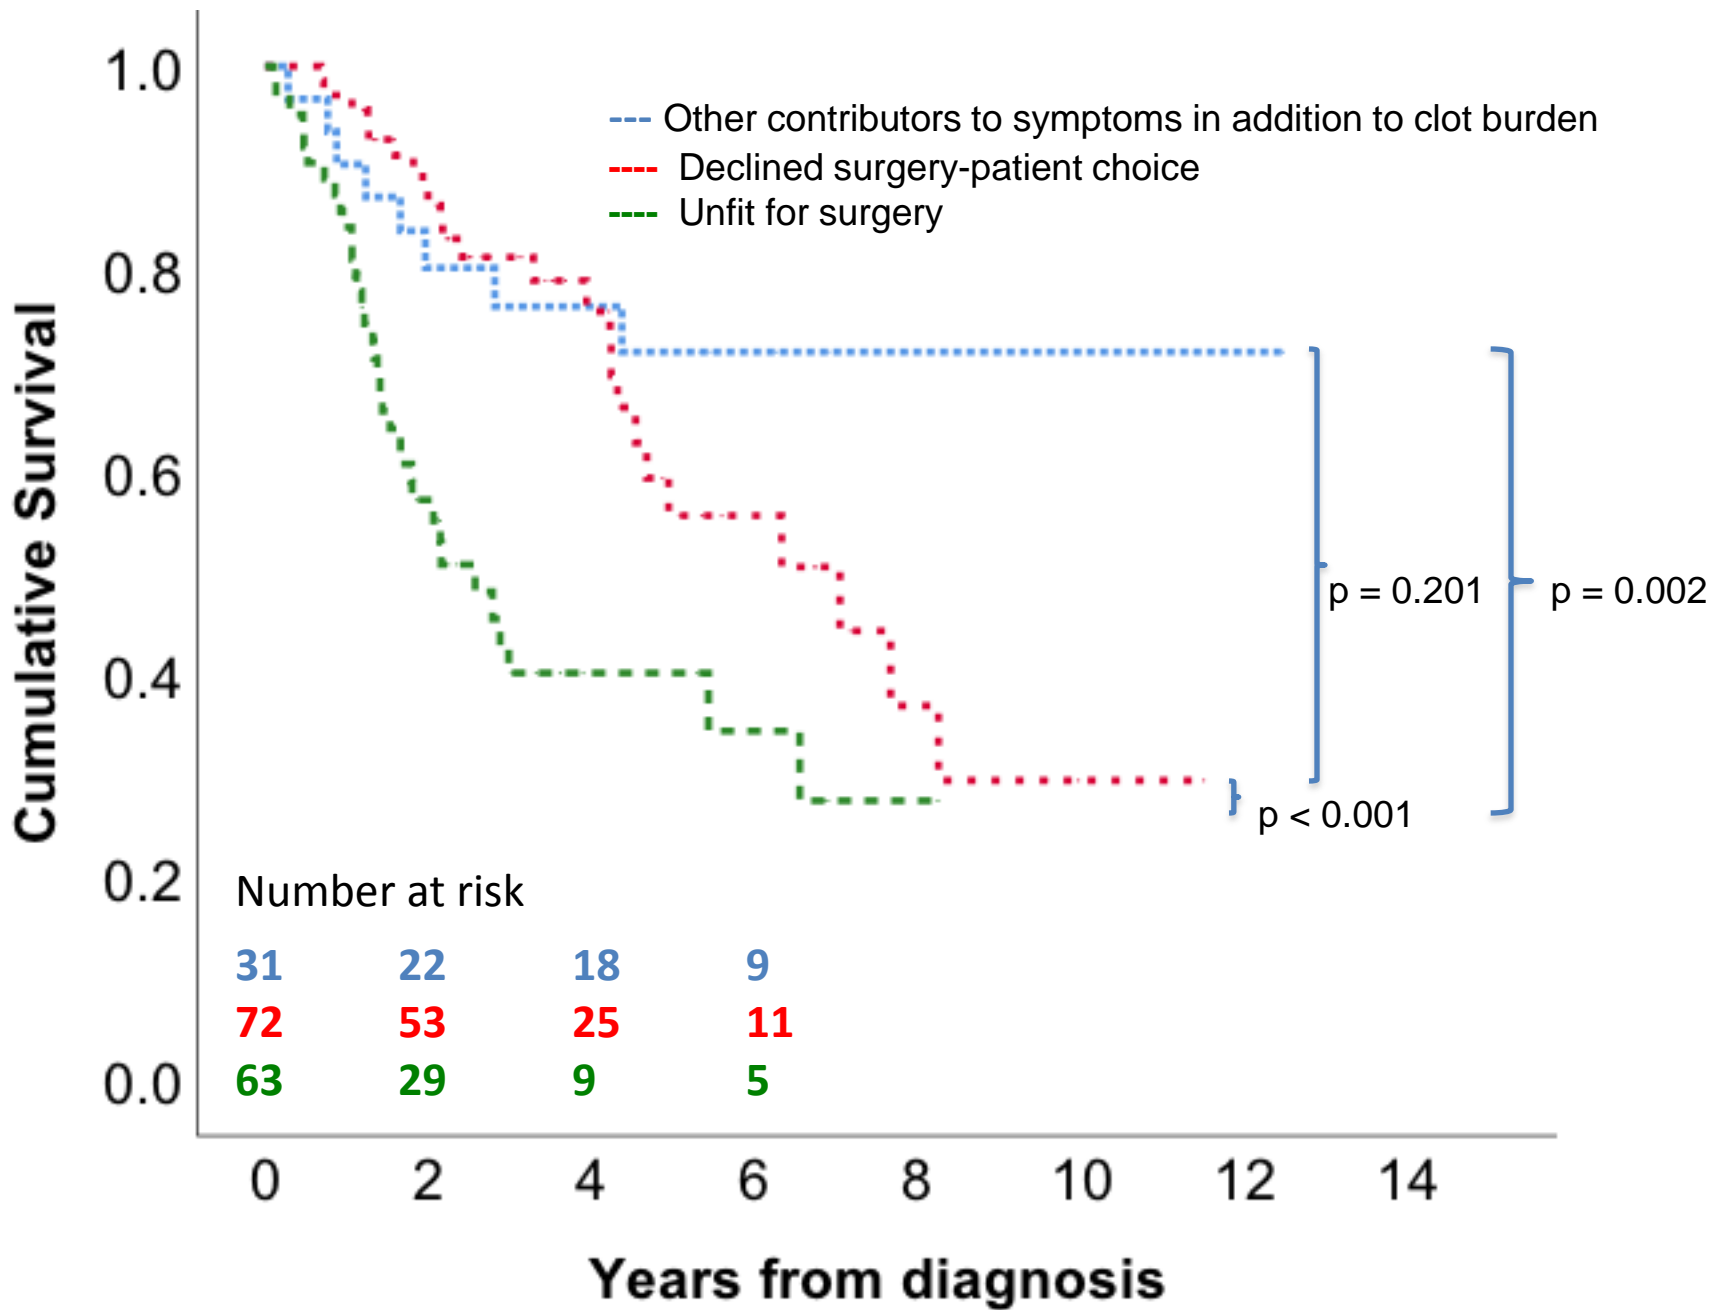

Supplement: inline-supplementary-material-1 [file inline-supplementary-material-1.pdf]
